# Supplementary material for: Chemical Identification of Secondary Metabolites from Rhizospheric Actinomycetes Using LC-MS Analysis: In Silico Antifungal Evaluation and Growth-Promoting Effects
Source: Preprints.org preprint supplement (doi:10.20944/preprints202304.0118.v1), 2023-04-07
Supplement: Supplementary file 2 [file supplementary]

Supplementary Material

Chemical Identification of Secondary Metabolites from Rhizospheric Actinomycetes Using LC-MS Analysis: *In Silico* Antifungal Evaluation and Growth-Promoting Effects

Hazem S. Elshafie 1, Laura De Martino 2, Carmen Formisano 3, Lucia Caputo 2, Vincenzo De Feo 2, Ippolito Camele 1,*

1 School of Agricultural, Forestry, Food and Environmental Sciences, University of Basilicata,
85100 Potenza, Italy; [hazem.elshafie@unibas.it](mailto:hazem.elshafie@unibas.it) (H.S.E.)

2 Department of Pharmacy, University of Salerno, Via Giovanni Paolo II 132, 84084 Fisciano, Salerno, Italy; [ldemartino@unisa.it](mailto:ldemartino@unisa.it) (L.D.M.); [lcaputo@unisa.it](mailto:lcaputo@unisa.it) (L.C.); [defeo@unisa.it](mailto:defeo@unisa.it) (V.D.F.)

3 Department of Pharmacy, School of Medicine and Surgery, University of Naples Federico II, Via Montesano 49, 80131 Naples, Italy; [carmen.formisano2@unina.it](mailto:carmen.formisano2@unina.it) (C.F.)

***** Correspondence: [ippolito.camele@unibas.it](mailto:ippolito.camele@unibas.it) (I.C.); Tel.: +39-0971-205544; Fax: +39-0971-205503


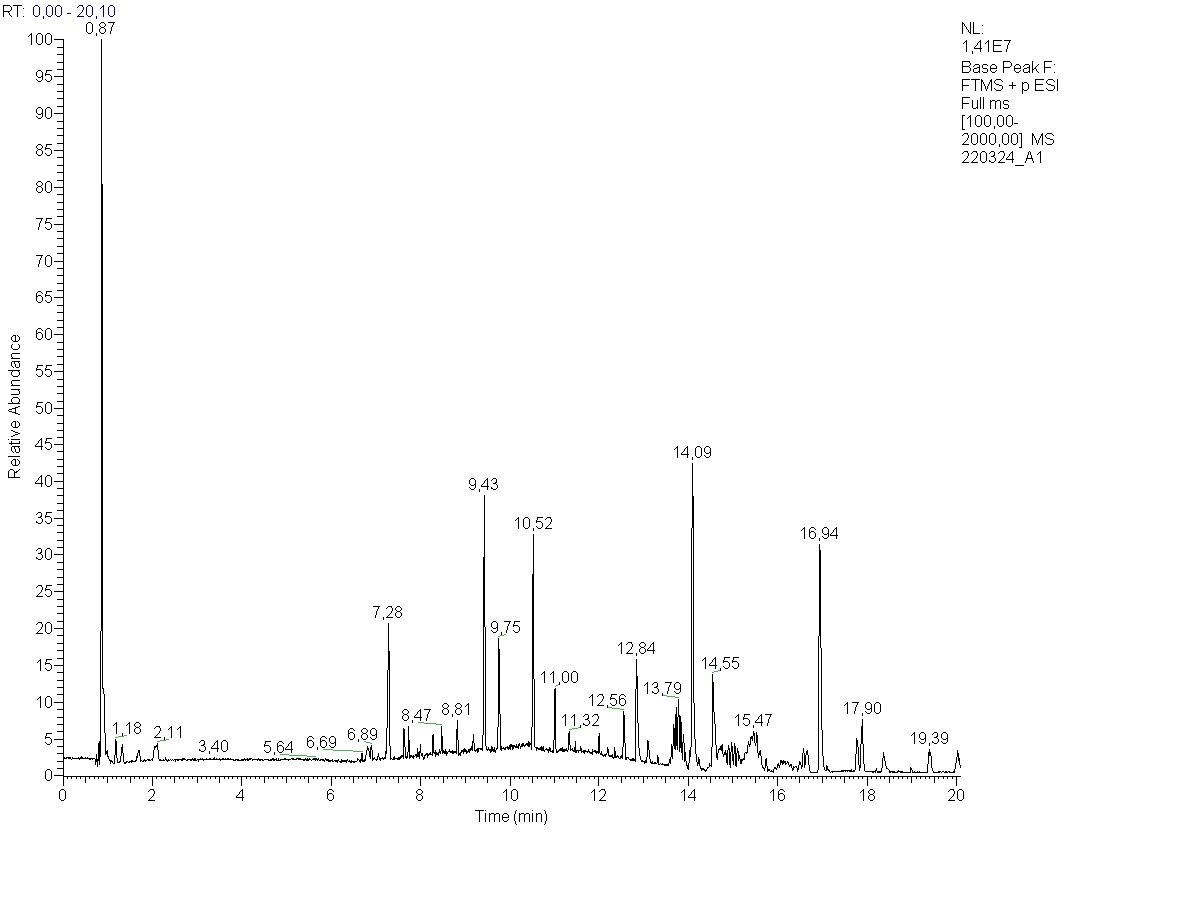


**Figure S1.** LC-MS chromatogram of the metabolites extract from *Streptomyces* spp. (Act11).


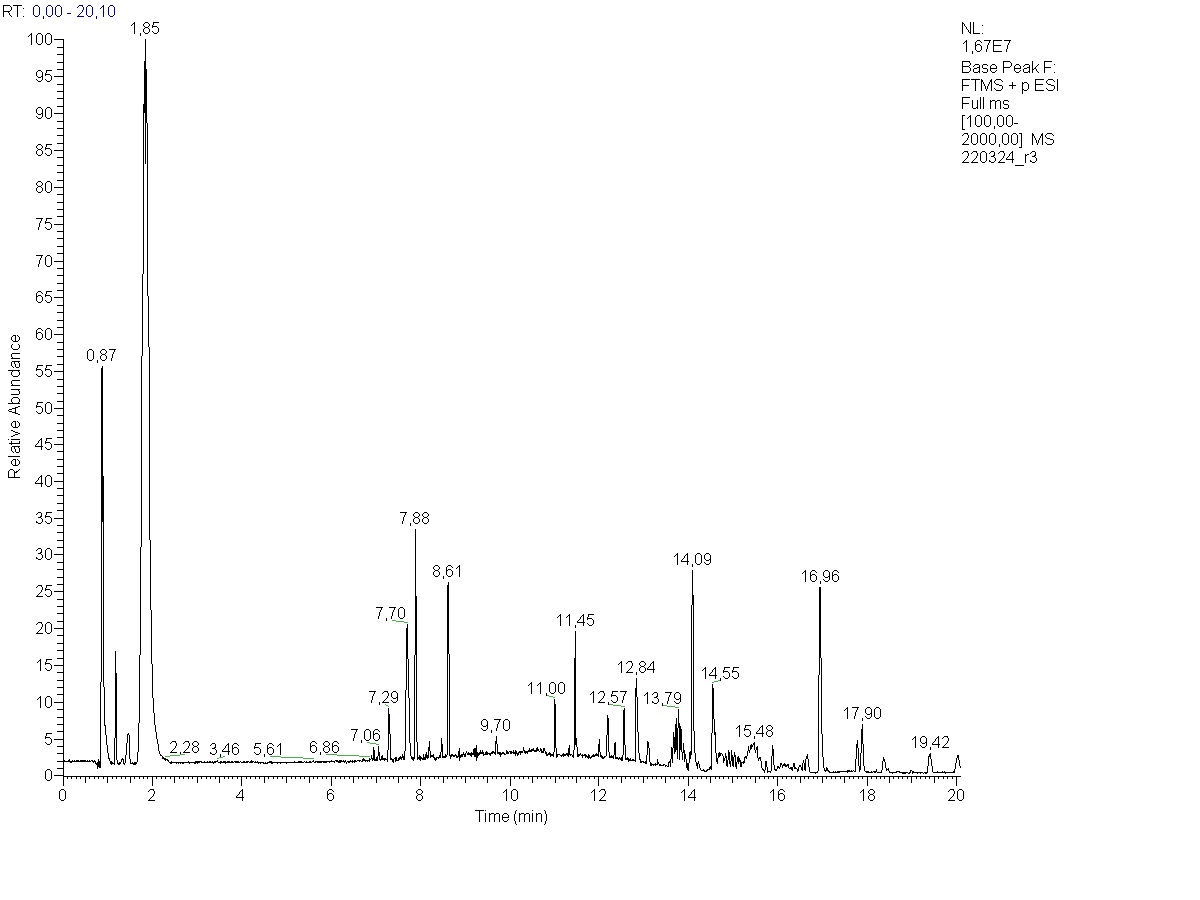


**Figure S2.** LC-MS chromatogram of the metabolites extract from *S. atratus* (Act2).


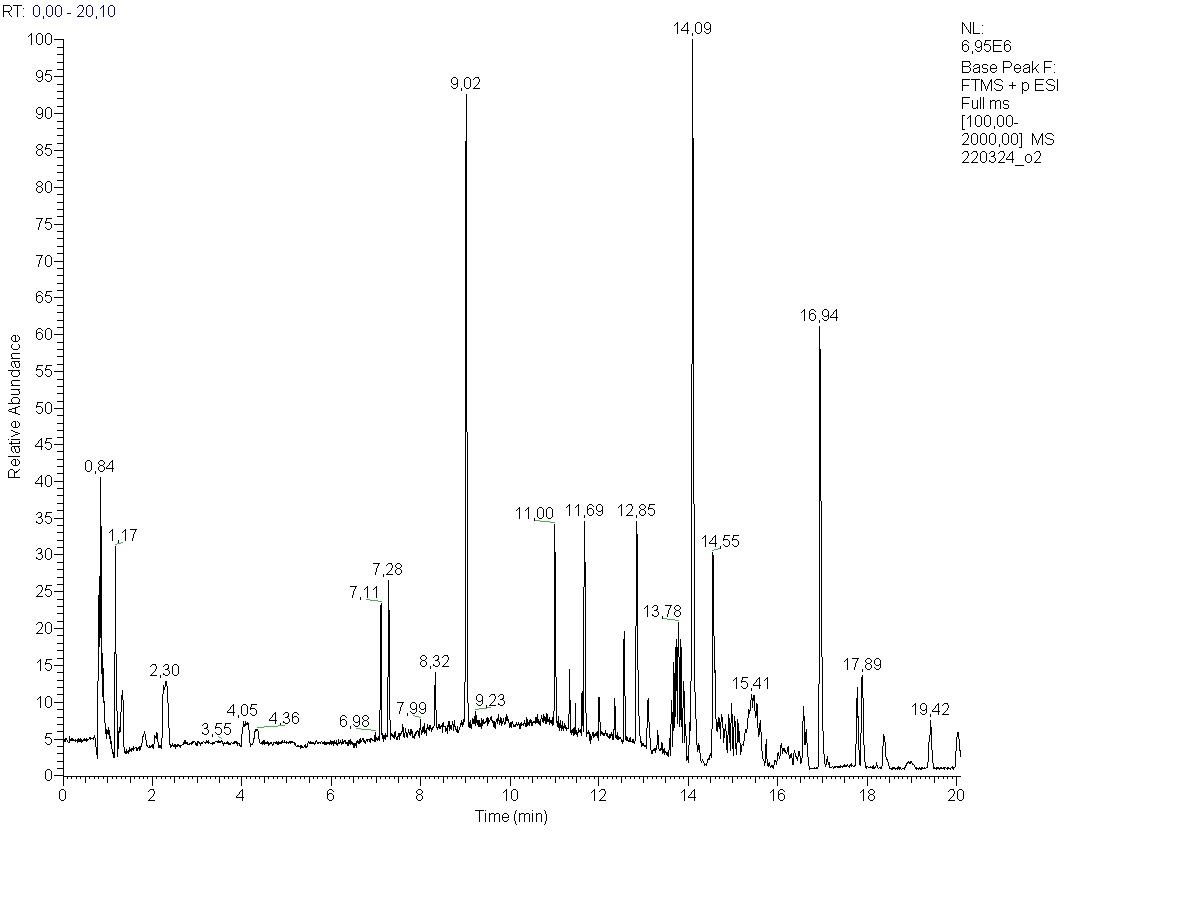


**Figure S3.** LC-MS chromatogram of the metabolites extract from *A. humicola* (Act3).
